# Supplementary material
Source: PubMed Central journal article supplement (PMC5735010)
Supplement: NIHMS900071-supplement-Supp_FigS2.pdf [file NIHMS900071-supplement-Supp_FigS2.pdf]

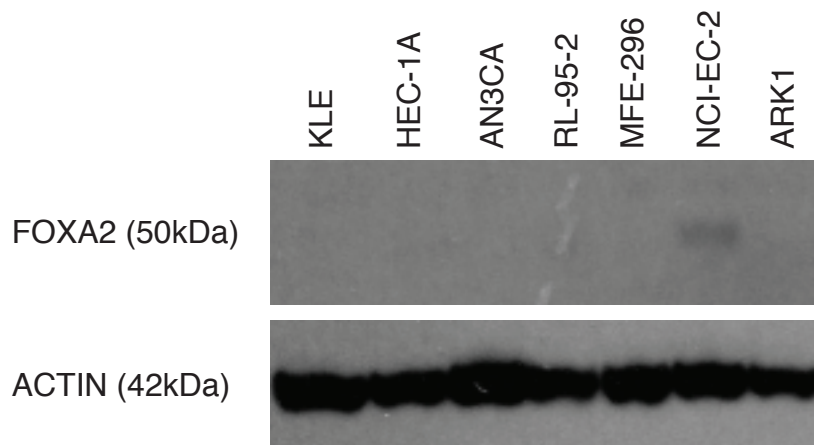

**Supplementary Figure 2.** Immunoblot showing low-level FOXA2 expression in the NCI-EC-2 clear cell endometrial cancer cell line. A total of 45ug of protein lysate was loaded for each cell line; FOXA2 signal represents a 15 min exposure to radiographic film. The amount of protein loaded is greater than for the immunoblot shown in Figure 3, and the exposure time is longer. Actin levels were assessed as a loading control.
